# Supplementary material
Source: PubMed Central journal article supplement (PMC2930113)
Supplement: NIHMS206000-supplement-Supplementary_tables.pdf [file NIHMS206000-supplement-Supplementary_tables.pdf]

## Supplemental data

**Supplemental table 1. Primers for RT-PCR**

| Genes                           | Orientation | Sequences                      | Size  |
|---------------------------------|-------------|--------------------------------|-------|
| <b>Nkx2.5</b>                   | Sense       | CCAAGTGCTCTCCTGCTTTCC          | 365bp |
|                                 | Antisense   | AGTCTGGTCCTGCCGCTGTC           |       |
| <b>GATA-4</b>                   | Sense       | CTCGATATGTTTGATGACTTCT         | 349bp |
|                                 | Antisense   | TCCGTTTTCTGGTTTGAATCCC         |       |
| <b><math>\alpha</math>-MHC</b>  | Sense       | GCTGAGCTACAACGTGTCCT           | 320bp |
|                                 | Antisense   | TCATACTTCTGCTTCCACTC           |       |
| <b><math>\beta</math>-MHC</b>   | Sense       | CCACATCCGTGCAGATAGA            | 445bp |
|                                 | Antisense   | CCTCGGGTTAGCTGAGAGA            |       |
| <b>MLC-2v</b>                   | Sense       | TGTGGGTCACCTGAGGCTGTGGTTCAG    | 189bp |
|                                 | Antisense   | GAAGGCTGACTATGTCCGGGAGATGC     |       |
| <b>VE-cad</b>                   | Sense       | AACACCAACAAAAACCTGGAACA        | 408bp |
|                                 | Antisense   | GGATTGAGTAAAGACGGGGAAG         |       |
| <b>Flk-1</b>                    | Sense       | CACCTGGCACTCTCCACCTTC          | 240bp |
|                                 | Antisense   | GATTCATCCCACTACCGAA            |       |
| <b>CD31</b>                     | Sense       | GTCATGGCCATGGTCGAGTA           | 261bp |
|                                 | Antisense   | CTCCTCGGCGATCTTGCTGAA          |       |
| <b>FGF5</b>                     | Sense       | ATGGCTCCCACGAAGCCAGTGTGTTAAGTA | 391bp |
|                                 | Antisense   | GGTGGCTTTTTCTTTTCTGGAACAGTGACG |       |
| <b>FOXA2</b>                    | Sense       | AGCAGCTACTATGCAGAGCCCGAGGGCTAC | 364bp |
|                                 | Antisense   | TACATGGGGCTCATGGAGTTCATGTTGGCG |       |
| <b>Nestin</b>                   | Sense       | GCTACCAGGAGCGCGTGGCACACATGGAGA | 232bp |
|                                 | Antisense   | CTGCTCCAGGGCCTCCACAGCCAGCTGGAA |       |
| <b>MAP2</b>                     | Sense       | GTACCTGGAGGTGGTAATGTCAAGATTGAC | 214bp |
|                                 | Antisense   | GCAGTGACATCCTCAGCCAAAGTGGCAAGC |       |
| <b>EphB4</b>                    | Sense       | CATCATTGCAGTTCTCTGCCTCAGGAAGCA | 228bp |
|                                 | Antisense   | CCCGGCACACCTCGCCGAACTCACCTGCAC |       |
| <b>EphrinB2</b>                 | Sense       | CTACTGGAATTCTCGAACTCCAAATTTCT  | 333bp |
|                                 | Antisense   | CCTCCAAAGACCCATTTGATGTAGATATAA |       |
| <b><math>\beta</math>-actin</b> | Sense       | GCTGAGAGGGAAATCGTGCGTGAC       | 454bp |
|                                 | Antisense   | TCTGCTGGAAGGTGGACAGTGAG        |       |
| <b>GAPDH</b>                    | Sense       | TGCGACTTCAACAGCAACTC           | 255bp |
|                                 | Antisense   | GATGGAAATTGTGAGGGAGA           |       |

**Supplemental table 2. Primers for Real-time PCR**

| <b>Genes</b>                   | <b>Orientation</b> | <b>Sequences</b>            | <b>Size</b> |
|--------------------------------|--------------------|-----------------------------|-------------|
| <b>Nkx2.5</b>                  | Sense              | CCCCAAGTGCTCTCCTGCTTTCCC    | 152bp       |
|                                | Antisense          | CGCCATCCGTCTCGGCTTTGTC      |             |
| <b>GATA-4</b>                  | Sense              | AGGAGGGGATTCAAACCAGAAAACG   | 209bp       |
|                                | Antisense          | GGAGCTGCTGTGCCCATAGTGAGAT   |             |
| <b><math>\alpha</math>-MHC</b> | Sense              | AACATTATGGGCTGGCTGGAAAAGAAC | 193bp       |
|                                | Antisense          | GGTGGAGAGCAGACACTGTTTGGAAGG |             |
| <b>VE-cad</b>                  | Sense              | CCGCCAGAATGCTAAGTATGTGCTCC  | 169bp       |
|                                | Antisense          | TTCCAGGTTTTTGTGGTGTTCCTTGTC |             |
| <b>CD31</b>                    | Sense              | TGACCCAGCAACATTCACAGATAAGC  | 202bp       |
|                                | Antisense          | TTTCACAGAGCACCGAAGTACCATTT  |             |
| <b>Fik-1</b>                   | Sense              | GAGGAGAAATCGCTCAGTGATGTAG   | 178bp       |
|                                | Antisense          | CCGATAGGAGAATGTTTCGTGCTG    |             |
| <b>GAPDH</b>                   | Sense              | AGAAGACTGTGGATGGCCCCTC      | 110bp       |
|                                | Antisense          | GATGACCTTGCCACAGCCTT        |             |
| <b>EphB4</b>                   | Sense              | CATTGAACAGGACTACCGGCTGCC    | 105bp       |
|                                | Antisense          | AAGCGGGGCCGGGCATTCCG        |             |
| <b>ephrinB2</b>                | Sense              | GAGCCCAGCGACATCATCATCC      | 118bp       |
|                                | Antisense          | GGGGGCATCTCCTGGACGATGTA     |             |

---
